# Supplementary material for: Genomic Analysis of Infectious Bursal Disease Virus in Nigeria: Identification of Unique Mutations of Yet Unknown Biological Functions in Both Segments A and B
Source: MDPI journal article supplement (doi:10.3390/vaccines11040867), 2023-04-19
Supplement: s1 [file s1]

Table S1. Amino acid substitutions at the VP5

[illegible]

Table S2. Amino acid substitutions at the VP2, VP4 and VP3

[illegible]

Table S3. Amino acid substitutions at the VP1

| STRAIN                               | PHENOTYPE     | VP1 |   |    |     |     |     |     |     |     |     |     |     |     |     |     |     |  |
|--------------------------------------|---------------|-----|---|----|-----|-----|-----|-----|-----|-----|-----|-----|-----|-----|-----|-----|-----|--|
|                                      |               | 990 | 4 | 23 | 119 | 141 | 145 | 146 | 147 | 150 | 158 | 163 | 219 | 242 | 269 | 390 | 391 |  |
| AYA57922.1 UK661                     | Very virulent | V   | V | T  | E   | V   | T   | D   | N   | D   | N   | A   | D   | E   | E   | M   | A   |  |
| Plateau 8426-5/2017 Nigeria          | ND            | A   | . | S  | D   | I   | Q   | E   | G   | E   | S   | V   | E   | D   | D   | L   | T   |  |
| Cross River 8426-6/2018 Nigeria      | ND            | A   | . | S  | D   | I   | Q   | E   | G   | .   | .   | V   | E   | D   | D   | L   | T   |  |
| Nasarawa 8426-8/2018 Nigeria         | ND            | A   | I | .  | D   | I   | Q   | E   | G   | E   | .   | V   | E   | D   | D   | L   | T   |  |
| Akwa Ibom 8426-10/2019 Nigeria       | ND            | A   | . | S  | D   | I   | Q   | E   | G   | E   | .   | V   | E   | D   | D   | L   | T   |  |
| AAM45384.1 T09 Nigeria               | Very virulent | .   | . | .  | .   | .   | .   | .   | .   | .   | .   | .   | .   | .   | .   | .   | .   |  |
| AFU10478.1 NIGERIA                   | Very virulent | A   | - | -  | -   | -   | -   | -   | -   | -   | -   | -   | -   | -   | -   | -   | .   |  |
| AFU10443.1 NIGERIA                   | Very virulent | A   | - | -  | -   | -   | -   | -   | -   | -   | -   | -   | -   | -   | -   | -   | .   |  |
| AMQ81722.1 MB11 India                | Attenuated    | A   | I | .  | .   | .   | N   | E   | G   | .   | .   | .   | .   | D   | .   | L   | .   |  |
| AFX62899.1 HN04 China                | Reassortant   | A   | I | .  | .   | .   | N   | .   | .   | .   | .   | .   | .   | .   | .   | .   | .   |  |
| AFP86286.1 GX-NNZ-11 China           | Reassortant   | A   | I | .  | .   | I   | S   | E   | D   | .   | .   | V   | .   | D   | .   | L   | .   |  |
| ACZ62645.1 HLJ-0504 China            | Reassortant   | A   | . | .  | .   | L   | .   | E   | G   | .   | .   | .   | .   | D   | .   | L   | .   |  |
| ANY95160.1 TH14/ABT/MVC/India        | Reassortant   | A   | I | .  | .   | .   | N   | E   | G   | .   | .   | .   | .   | D   | .   | .   | .   |  |
| ANY95157.1 VCN14/ABT/MVC/India       | Reassortant   | A   | I | .  | .   | .   | N   | E   | G   | .   | .   | .   | .   | D   | .   | L   | .   |  |
| AMQ24274.1 BGE14/ABT2/MVC/2015 INDIA | Reassortant   | A   | I | .  | .   | .   | N   | E   | G   | .   | .   | .   | .   | D   | .   | L   | .   |  |
| AAO15768.1 D78                       | Attenuated    | A   | I | .  | .   | .   | N   | E   | G   | .   | .   | .   | .   | D   | .   | L   | .   |  |
| AAD32617.1 VARIANT E                 | Variant       |     | . | .  | .   | .   | N   | E   | G   | .   | .   | .   | .   |     | .   | L   | .   |  |
| AYA57922.1 D6948                     | Very virulent | .   | . | .  | .   | .   | .   | .   | .   | .   | .   | .   | .   |     | .   |     | .   |  |
| AVH80604.1 IBDV/ITALY/1829/2011      |               | A   | I | .  | .   | .   | .   | E   | G   | .   | .   | .   | .   | D   | .   | L   | .   |  |
| AUS90754.1 16002 EGYPT               |               | A   | I | .  | .   | I   | .   | .   | .   | .   | .   | .   | .   | .   | .   | .   | .   |  |

| STRAIN           | PHENOTYPE     | VP1 |     |     |     |     |
|------------------|---------------|-----|-----|-----|-----|-----|
|                  |               | 393 | 562 | 695 | 697 | 761 |
| AYA57922.1 UK661 | Very virulent | D   | P   | R   | V   | K   |
